# Supplementary material
Source: publisher figshare collection journal article supplement (https://karger.figshare.com/ndownloader/files/24618833)
Supplement: Supplementary file 1 [file 24618833]

**Supplementary Table 5 The clinical information of individuals in the QRT-PCR**

| **Individuals** | **Blood glucose (mmol/L)** | **Total cholesterol**  **(mmol/L)** | **Triglyceride**  **(mmol/L)** | **High-density lipoprotein**  **(mmol/L)** | **Low-density lipoprotein**  **(mmol/L)** | **Hypertension history** | **Diabetes history** | **Hyperlipidemia history** | **Cardiopathy history** |
| --- | --- | --- | --- | --- | --- | --- | --- | --- | --- |
| Normal | 5.1 | 3.3 | 1.05 | 1.17 | 1.68 | No | No | No | No |
|  |  |  |  |  |  |  |  |  |  |
| Normal | 5.15 | 4.54 | 0.86 | 1.58 | 2.57 | No | No | No | No |
|  |  |  |  |  |  |  |  |  |  |
| Normal | 4.46 | 4.65 | 0.73 | 2.11 | 2.21 | No | No | No | No |
|  |  |  |  |  |  |  |  |  |  |
| Normal | 5.3 | 4.46 | 1.28 | 1.1 | 2.18 | No | No | No | No |
|  |  |  |  |  |  |  |  |  |  |
| Normal | 3.67 | 5.15 | 0.91 | 1.77 | 2.01 | No | No | No | No |
|  |  |  |  |  |  |  |  |  |  |
| Case | 4.6 | 4.21 | 1.26 | 0.96 | 2.67 | No | No | No | Yes |
|  |  |  |  |  |  |  |  |  |  |
| Case | 8.3 | 4.46 | 1.28 | 1.1 | 2.78 | No | Yes | No | Yes |
|  |  |  |  |  |  |  |  |  |  |
| Case | 6.7 | 3.87 | 0.95 | 1.12 | 2.32 | Yes | No | No | Yes |
|  |  |  |  |  |  |  |  |  |  |
| Case | 5.8 | 2.99 | 0.96 | 0.85 | 1.7 | Yes | No | No | Yes |
|  |  |  |  |  |  |  |  |  |  |
| Case | 8.6 | 3.39 | 0.79 | 1.03 | 2 | Yes | Yes | No | Yes |
